# Supplementary material for: Stem cells for bronchopulmonary dysplasia in preterm infants: A randomized controlled phase II trial
Source: PubMed Central journal article supplement — Stem Cells Transl Med. 2021 Apr 20;10(8):1129–37. doi: 10.1002/sctm.20-0330 (PMC8284779; doi:10.1002/sctm.20-0330), 2021-04-20
Supplement: SCT3-10-1129-s001.pdf [file SCT3-10-1129-s001.pdf]

**Online Data Supplement**

1

2 **Stem Cell for Bronchopulmonary Dysplasia in Preterm Infants: A Randomized**

3 **Controlled Phase 2 Trial**

4

5

6

7

8

9

10

11

12

13

14

15

16

17

18

19

1 **Supplementary Materials**

2

3 **Cytokine and factor analysis in tracheal aspirate fluid**

4 Tracheal aspirate fluid (TAF) samples were obtained twice (before and 7 days after  
5 transplantation) by suctioning the major airways after 0.5 mL of saline had been instilled into  
6 the endotracheal tube. The following cytokines and growth factors were measured:  
7 interleukin (IL)-1 $\alpha$ , IL-1 $\beta$ , IL-6, IL-8, tumor necrosis factor (TNF)- $\alpha$ , matrix  
8 metalloproteinase (MMP)-9, vascular endothelial growth factor (VEGF), and hepatic growth  
9 factor (HGF). The supernatant of tracheal aspirate fluid was frozen at -70°C after  
10 centrifugation at 15,000 rpm for 10 min. Quantities of hepatic growth factor and MMP-9  
11 were calculated by enzyme immunoassay with the Quantikine kit (R&D Systems, Inc.,  
12 Minneapolis, MN, USA). IL-1 $\alpha$ / $\beta$ , IL-6, IL-8, TNF- $\alpha$ , and VEGF were measured with the  
13 Milliplex MAP ELISA Kit (Millipore, Billerica, MA, USA), according to the manufacturer's  
14 specifications.

15

16

17

18

19

20

21

## 1 Summary of the Clinical Trial Protocol

|                                   |                                                                                                                                                                                                                                                                                                                                                                                                                                                                                                                                                                                                                                                                                                                                                                                                                        |
|-----------------------------------|------------------------------------------------------------------------------------------------------------------------------------------------------------------------------------------------------------------------------------------------------------------------------------------------------------------------------------------------------------------------------------------------------------------------------------------------------------------------------------------------------------------------------------------------------------------------------------------------------------------------------------------------------------------------------------------------------------------------------------------------------------------------------------------------------------------------|
| <b>Protocol number</b>            | MP-CR-009                                                                                                                                                                                                                                                                                                                                                                                                                                                                                                                                                                                                                                                                                                                                                                                                              |
| <b>Phase</b>                      | Phase 2                                                                                                                                                                                                                                                                                                                                                                                                                                                                                                                                                                                                                                                                                                                                                                                                                |
| <b>Test drug</b>                  | PNEUMOSTEM <sup>®</sup> (Mesenchymal stem cells derived from allogeneic cord blood)                                                                                                                                                                                                                                                                                                                                                                                                                                                                                                                                                                                                                                                                                                                                    |
| <b>Design</b>                     | Multi-center, randomized, double-blind, placebo, phase 2 clinical trial                                                                                                                                                                                                                                                                                                                                                                                                                                                                                                                                                                                                                                                                                                                                                |
| <b>Title</b>                      | Randomized, double-blind, multi-center phase 2 clinical trial to evaluate the efficacy and safety of pneumostem <sup>®</sup> compared with placebo groups in the treatment of infant bronchopulmonary dysplasia                                                                                                                                                                                                                                                                                                                                                                                                                                                                                                                                                                                                        |
| <b>Objective</b>                  | <p><b>Primary objective:</b><br/>To evaluate the efficacy of one-time intratracheal administration of pneumostem<sup>®</sup> in high-risk patients with infant bronchopulmonary dysplasia compared to the placebo group</p> <p><b>Secondary objective:</b><br/>To evaluate the safety of one-time intratracheal administration of pneumostem<sup>®</sup> in high-risk patients with infant bronchopulmonary dysplasia compared to the placebo group</p>                                                                                                                                                                                                                                                                                                                                                                |
| <b>Subjects</b>                   | Patients that are less than 29 weeks of gestational age, have a birth weight of 1,250 g or less, are premature infants within 2 weeks after birth, and need ventilator support as their ventilation rate is > 12 times/min and oxygen demand > 25%                                                                                                                                                                                                                                                                                                                                                                                                                                                                                                                                                                     |
| <b>Expected test period</b>       | 45 months from the date of approval of the clinical trial protocol by the Ministry of Food and Drug Safety                                                                                                                                                                                                                                                                                                                                                                                                                                                                                                                                                                                                                                                                                                             |
| <b>Institute and investigator</b> | <p>1) Coordinator:<br/>Prof. Won Soon Park<br/>Professor at Sungkyunkwan University School of Medicine, Pediatric Adolescent Center, Samsung Medical Center</p> <p>2) Clinical trial investigators</p> <p>① Samsung Medical Center<br/>Principal Investigator: Prof. Won Soon Park, Sungkyunkwan University School of Medicine, Pediatric Adolescent Center<br/>Co-researchers: Prof. Yun Sil Chang, Sungkyunkwan University School of Medicine, Pediatric Adolescent Center</p> <p>② Asan Medical Center<br/>Principal Investigator: Prof. Ae Ran Kim, University of Ulsan College of Medicine, Pediatric Adolescent Center</p> <p>3) Institute</p> <p>① Samsung Medical Center, 81 Irwon-Ro Gangnam-gu, Seoul<br/>② Asan Medical Center, 88 Olympic-ro 43-gil, Songpa-gu, Seoul</p> <p>A total of two institutes</p> |

|                                         |                                                                                                                                                                                                                                                                                                                                                                                                                                                                                                                                                                                                                                                                                                                                                                                                                                                                                                                                                                                                                                                                                                                                                                                                                                                                                                                                                                                                                                                                                                                                    |
|-----------------------------------------|------------------------------------------------------------------------------------------------------------------------------------------------------------------------------------------------------------------------------------------------------------------------------------------------------------------------------------------------------------------------------------------------------------------------------------------------------------------------------------------------------------------------------------------------------------------------------------------------------------------------------------------------------------------------------------------------------------------------------------------------------------------------------------------------------------------------------------------------------------------------------------------------------------------------------------------------------------------------------------------------------------------------------------------------------------------------------------------------------------------------------------------------------------------------------------------------------------------------------------------------------------------------------------------------------------------------------------------------------------------------------------------------------------------------------------------------------------------------------------------------------------------------------------|
| <b>Criteria for selecting subjects</b>  | <ol style="list-style-type: none"> <li>1) Age within 5 to 14 days of birth</li> <li>2) Patients within 23 to 29 weeks of gestational age</li> <li>3) Patients with a birth weight of 500g to 1,250 g</li> </ol>                                                                                                                                                                                                                                                                                                                                                                                                                                                                                                                                                                                                                                                                                                                                                                                                                                                                                                                                                                                                                                                                                                                                                                                                                                                                                                                    |
| <b>Criteria for excluding subjects</b>  | <ol style="list-style-type: none"> <li>1) Patients with a cyanotic congenital heart malformation causing cyanosis or heart failure, except infants with patent ductus arteriosus</li> <li>2) Patients with severe lung malformations, such as pulmonary hypoplasia, congenital diaphragmatic hernia, and congenital cystic diseases</li> <li>3) Patients with chromosomal abnormalities (e.g., Edward syndrome, Patau syndrome, and Down syndrome) accompanied by severe malformations and severe congenital anomalies (e.g., Hydrocephalus, Encephalocele)</li> <li>4) Patients with severe congenital infections (e.g., Herpes, Toxoplasmosis, Rubella, Syphilis, and AIDS)</li> <li>5) Patients with C-reactive protein (CRP) &gt; 30 mg/dl and severe sepsis or shock due to active infection that has not been properly treated with antibiotics</li> <li>6) Patients who performed surgery or are expected to have surgery within 72 h before and after administration of the test drug</li> <li>7) Patients who were administered a surfactant 24 h before administration of the test drug</li> <li>8) Patients with intracranial hemorrhage of bilateral grade 3/4</li> <li>9) Patients with active pulmonary hemorrhage or active air leak syndrome at the time of screening</li> <li>10) Patients who have participated in other clinical trials</li> <li>11) Patients who are allergic to gentamicin antibiotics</li> </ol> <p>Patients deemed inappropriate by other researchers to participate in clinical trials</p> |
| <b>Administration method and dosage</b> | <p>For subjects assigned to the Pneumostem<sup>®</sup> group, one-time intracheal administration of Pneumostem<sup>®</sup> at <math>1.0 \times 10^7</math> cells/kg</p>                                                                                                                                                                                                                                                                                                                                                                                                                                                                                                                                                                                                                                                                                                                                                                                                                                                                                                                                                                                                                                                                                                                                                                                                                                                                                                                                                            |
| <b>Method</b>                           | <p>This is a randomized, double-blind, multi-center, and phase 2 clinical trial which administers a placebo or Pneumostem<sup>®</sup> once in intracheally to those with ventilation rate &gt; 12 times/min and oxygen demand &gt; 25% in patients who were receiving ventilator support for 5 to 14 days after birth and are premature infants less than 29 weeks of gestational age, with a birth weight of 1,250g or less.</p> <p>Premature infants who agree to participate in this trial, who meet the selection criteria, and do not meet the exclusion criteria are randomized to either <math>1.0 \times 10^7</math> cells/kg Pneumostem<sup>®</sup> or the placebo group. At this time, the subjects' gestational age is classified into two strata, and stratified randomization is performed to eliminate an imbalance between the Pneumostem<sup>®</sup> and placebo group. The strata are divided into two strata: less than 25 weeks of gestational age and more than 25 weeks of gestational age. Subjects assigned to the Pneumostem<sup>®</sup> group are evaluated for the incidence of moderate or severe bronchopulmonary dysplasia (BDP) or death at 36 weeks postmenstrual age (PMA) after one intracheal administration of the test drug.</p>                                                                                                                                                                                                                                                               |

|                                     |                                                                                                                                                                                                                                                                                                                                                                                                                                                                                                                                                                                                              |
|-------------------------------------|--------------------------------------------------------------------------------------------------------------------------------------------------------------------------------------------------------------------------------------------------------------------------------------------------------------------------------------------------------------------------------------------------------------------------------------------------------------------------------------------------------------------------------------------------------------------------------------------------------------|
| <b>Efficacy evaluation variable</b> | <u>Primary evaluation variable</u><br>Incidence of moderate or severe BPD or death at 36 weeks of PMA<br><u>Secondary evaluation variable</u><br>Severe BPD or death<br>Survival at 28 days of birth, at 36 weeks PMA, and discharge<br>Duration of ventilator dependence<br>Duration of intubation<br>Postnatal steroid use (%) for the purpose of weaning the ventilator<br>Cumulative duration of oxygen use<br><u>Stage III or higher retinopathy of prematurity (ROP)</u><br>ROP requiring treatment (avastin OR laser)<br>Growth rate (Z-score)<br>Period of hospitalization until the first discharge |
| <b>Safety evaluation variable</b>   | Safety data identified by the following tests<br>Adverse reactions directly related to transplantation<br>Frequency of pneumothorax requiring chest tube insertion<br>Frequency of moderate or severe pulmonary hemorrhage                                                                                                                                                                                                                                                                                                                                                                                   |

### Observation Schedule (Study Flow-Chart)

|                                                 | Screening                         | D 1 Treatment | D 2    | D 3              | D 7             | W 2    | Birth D 28 | PMA W 36         | At Discharge Or Discontinuation | F/U               |
|-------------------------------------------------|-----------------------------------|---------------|--------|------------------|-----------------|--------|------------|------------------|---------------------------------|-------------------|
|                                                 | -14D~                             |               |        |                  | ±D1             | ±D1    | ±D2        | ±D4              | ±D4                             | W 24              |
| Visit No.                                       | 1                                 | 2             | 3      | 4                | 5               | 6      | 7          | 8 <sup>10)</sup> | 9                               | 10 <sup>11)</sup> |
| Written consent                                 | V                                 |               |        |                  |                 |        |            |                  |                                 |                   |
| Checking selection/exclusion criteria           | V                                 |               |        |                  |                 |        |            |                  |                                 |                   |
| Demographic and delivery survey <sup>1)</sup>   | V                                 |               |        |                  |                 |        |            |                  |                                 |                   |
| Checking medical history and medication         | V                                 |               |        |                  |                 |        |            |                  |                                 |                   |
| Physical examination                            | V                                 | V             | V      | V                | V               | V      | V          | V                | V                               | V                 |
| Vital signs                                     | V                                 | V             | V      | V                | V               | V      | V          | V                | V                               | V <sup>10)</sup>  |
| Physical measurement (Wt, Ht, HC)               | V                                 | V (Wt)        | V (Wt) | V (Wt)           | V (Wt)          | V (Wt) | V (Wt)     | V (Wt)           |                                 | V                 |
| Chest X-ray                                     | V                                 | V             | V      | V                | V               | V      | V          | V                | V                               | V                 |
| Cranial US                                      | V <sup>12)</sup>                  |               | V      |                  | V               | V      | V          | V                |                                 |                   |
| Echocardiogram                                  | V <sup>12)</sup>                  |               |        |                  | V               |        | V          | V                |                                 |                   |
| ECG test <sup>2)</sup>                          | V                                 |               |        |                  |                 |        |            | V                |                                 |                   |
| Blood gas analysis <sup>3)</sup> (CBGA or ABGA) | V                                 | V             | V      | V                | V               | V      | V          | V                |                                 |                   |
| Laboratory test <sup>4)</sup>                   | V <sup>13)</sup>                  | V             |        | V <sup>15)</sup> | V               | V      | V          | V                | V                               | V                 |
| Tracheal suction fluid test <sup>5)</sup>       | V                                 |               |        |                  | V <sup>6)</sup> |        |            |                  |                                 |                   |
| TTA Culture                                     | V <sup>14)</sup><br>Blood Culture |               | V      |                  | V <sup>6)</sup> |        |            |                  |                                 |                   |
| Test drug administration                        |                                   | V             |        |                  |                 |        |            |                  |                                 |                   |
| BPD evaluation                                  |                                   |               |        |                  |                 |        |            | V                | V                               |                   |

|                                                  |  |   |                 |                 |                 |                 |   |   |   |                 |
|--------------------------------------------------|--|---|-----------------|-----------------|-----------------|-----------------|---|---|---|-----------------|
| Efficacy evaluation other than BPD <sup>7)</sup> |  |   | V <sup>8)</sup> | V <sup>8)</sup> | V <sup>8)</sup> | V <sup>8)</sup> | V | V | V | V <sup>9)</sup> |
| Checking adverse reactions                       |  | V | V               | V               | V               | V               | V | V | V | V               |
| Checking concomitant medication                  |  | V | V               | V               | V               | V               | V | V | V | V               |

- 1
  - 2
  - 3
  - 4
  - 5
  - 6
  - 7
  - 8
  - 9
  - 10
  - 11
  - 12
  - 13
  - 14
  - 15
  - 16
  - 17
  - 18
  - 19
  - 20
  - 21
  - 22
  - 23
  - 24
  - 25
  - 26
  - 27
  - 28
  - 29
- 1) Demographic and delivery information: Factors such as gender, date of birth, Apgar score(1, 5 min), birth weight, height and gestational age, multiple birth, premature rupture of membranes, birth weight appropriateness for GA, delivery form, history of maternal gestational hypertension, pathologic chorioamnionitis (it takes about 2 weeks to confirm test results, so results are recorded later) are surveyed.
  - 2) An ECG test is performed by selecting a lead that is easy to observe, and continuous ECG monitoring is performed from Day 1 to Day 3 when the test drug is administered.
  - 3) Blood gas analysis (CBGA or ABGA): pH, PO<sub>2</sub>, PCO<sub>2</sub>, base excess (In case of CBGA, PO<sub>2</sub> test is excluded)
  - 4) Laboratory tests: WBC, RBC, hemoglobin, hematocrit, platelet count, glucose, AST(SGOT), ALT(SGPT), total bilirubin, alkaline phosphatase, total protein, albumin, BUN, Creatinine, CRP
  - 5) Tracheal suction fluid test: IL-1, IL-6, IL-8, IL-10, TNF-a, MMP-9, TGF-b, HGF, VEGF
  - 6) If the subject's extubation occurs before Day 7, this test may be performed immediately before extubation.
  - 7) Evaluation of efficacy other than BPD: intubation, ventilator treatment, assisted positive-pressure ventilation, oxygen administration, survival, length of hospitalization, ROP, steroid use for the purpose of weaning off the ventilator
  - 8) Steroid use for the purpose of weaning off the ventilator
  - 9) Survival survey, growth rate, steroid use to wean off the ventilator
  - 10) If the visit schedule on Visit 7 (28<sup>th</sup> day of birth) is included in the window of another visit, the results of the test conducted at Visit 7 are used instead.
  - 11) If the visit schedule on Visit 8 (36 weeks of PMA) is included in the window of another visit, the results of the test conducted at Visit 8 are used instead.
  - 12) If there is a test result within a week of screening, the test result replaces the screening result based on the researcher's judgement.
  - 13) If there is a test result within a week of screening, the test result replaces the screening result.
  - 14) The test results before screening can be used based on the researcher's judgement.
  - 15) Based on the researcher's judgement, clinically necessary items can be selected and tested among laboratory test items.
  - 16) Blood pressure can be measured at the discretion of the researcher.
